# Supplementary material for: (Oligo)mannose functionalized hydroxyethyl starch nanocapsules: en route to drug delivery systems with targeting properties
Source: Royal Society of Chemistry journal article supplement (doi:10.1039/c3tb20138d), 2013-01-01
Supplement: c3tb20138d.pdf [file c3tb20138d.pdf]

# (Oligo)mannose functionalized hydroxyethyl starch nanocapsules: en route to drug delivery systems with targeting properties

Hélène Freichels<sup>1, ‡</sup>, Manfred Wagner<sup>1</sup>, Patricia Okwieka<sup>1,2</sup>, Ralf Georg Meyer<sup>2</sup>, Volker

Mailänder<sup>1,2</sup>, Katharina Landfester<sup>1</sup>, Anna Musyanovych<sup>1\*</sup>

## Supplementary Information

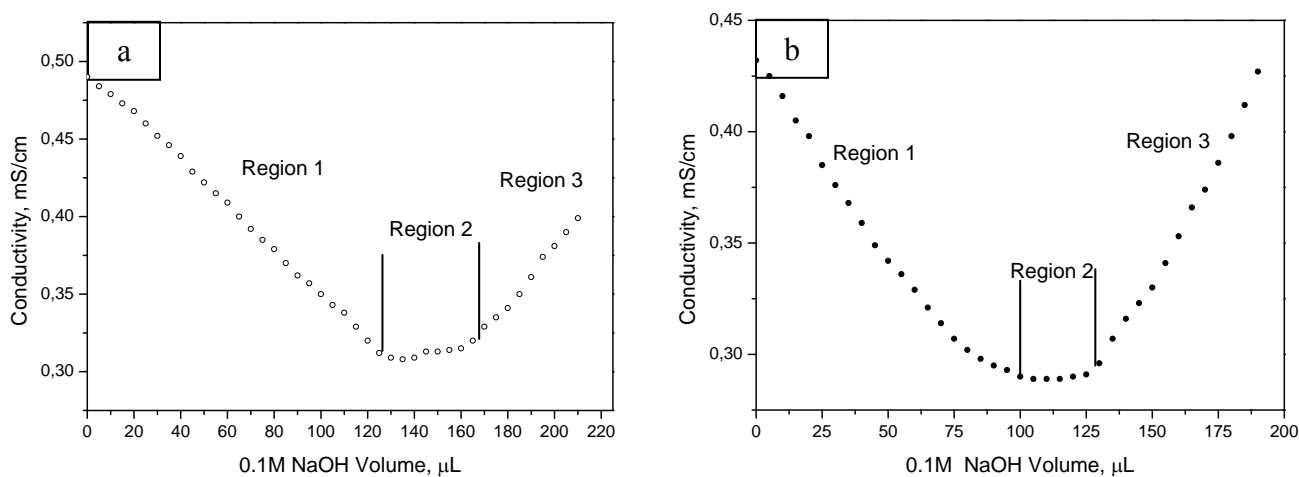

**Fig. S1** Conductometric titration curves for HES (a) and PU (b) NCs.

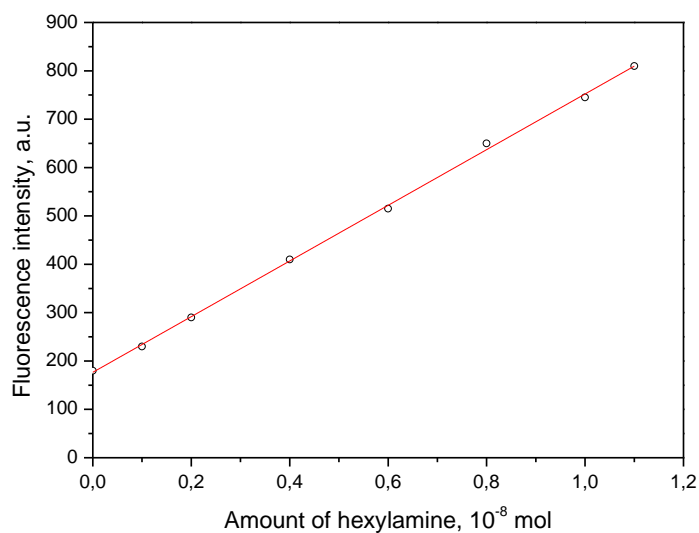

**Fig. S2** Representative calibration curve for the determination of the amine content by reaction with fluorescamine. Solid content of polystyrene particles corresponds to 0.54 wt%.

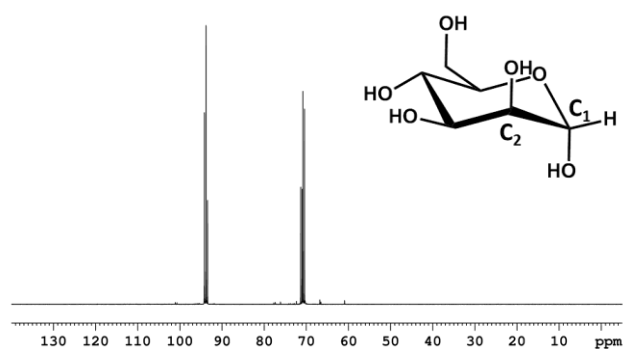

**Fig. S3** Chemical structure of <sup>13</sup>C labeled mannose at position C<sub>1</sub> and C<sub>2</sub> and its <sup>13</sup>C-NMR spectrum (125 MHz, D<sub>2</sub>O, 298.3 K).

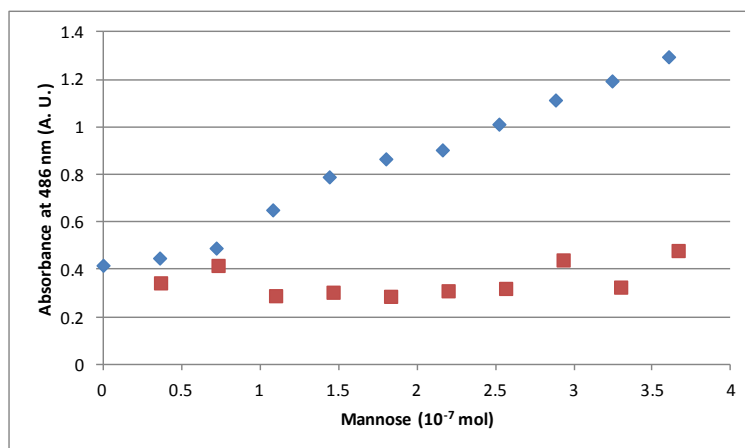

**Fig. S4** Comparison of the absorbance at 486 nm after the phenol/sulfuric acid assay of mannose (blue dots) and mannitol (red dots).
